# Supplementary material for: Enhancing NIR emission in ZnAl2O4:Nd,Ce nanofibers by co-doping with Ce and Nd: a promising biomarker material with low cytotoxicity
Source: Royal Society of Chemistry journal article supplement (doi:10.1039/d0tc04752j), 2020-11-23
Supplement: d0tc04752j1.pdf [file d0tc04752j1.pdf]

## Supplementary Material

# Enhancing NIR Emission in ZnAl<sub>2</sub>O<sub>4</sub>:Nd,Ce Nanofibers by co-doping with Ce and Nd: a Promising Biomarker Material with a Low Cytotoxicity

Rocío Estefanía Rojas-Hernandez<sup>\*, ||</sup> , Fernando Rubio-Marcos<sup>†, §</sup>, Giulio Gorni<sup>&</sup>, Carlo Marini<sup>&</sup>, Mati Danilson<sup>£</sup>, Laura Pascual<sup>¥</sup>, Rodrigo Uchida Ichikawa<sup>β</sup>, Irina Hussainova<sup>||</sup>, José Francisco Fernandez<sup>†</sup>

<sup>||</sup> *Department of Mechanical and Industrial Engineering, Tallinn University of Technology, Ehitajate 5, 19180 Tallinn, Estonia*

<sup>†</sup> *Electroceramic Department, Instituto de Cerámica y Vidrio, CSIC, Kelsen 5, 28049, Madrid, Spain*

<sup>£</sup> *Department of Material and Environmental Technology, Tallinn University of Technology, Ehitajate 5, 19180 Tallinn, Estonia*

<sup>§</sup> *Escuela Politécnica Superior. Universidad Antonio de Nebrija. C/Pirineos, 55, 28040, Madrid, Spain*

<sup>&</sup> *CELLS - ALBA Synchrotron Radiation Facility, Carrer de la Llum 2-26, 08290, Cerdanyola del Valles, Barcelona, Spain*

<sup>¥</sup> *Instituto de Catálisis y Petroleoquímica CSIC, ICP-CSIC, C/Marie Curie 2, 28049, Madrid, Spain*

<sup>β</sup> *Instituto de Pesquisas Energéticas e Nucleares, IPEN/CNEN, Av. Lineu Prestes, 2242, 05508-000, São Paulo – SP, Brazil*

## Supplementary Information 1.

The morphology of  $\gamma$ -Al<sub>2</sub>O<sub>3</sub> is shown in **Figure S1 a and b**. The size distribution of nanofibers is uniform, and the average diameter is about 20-50 nm. The as-received  $\gamma$ -Al<sub>2</sub>O<sub>3</sub> fibers are of 200 nm to 1.2  $\mu$ m long.

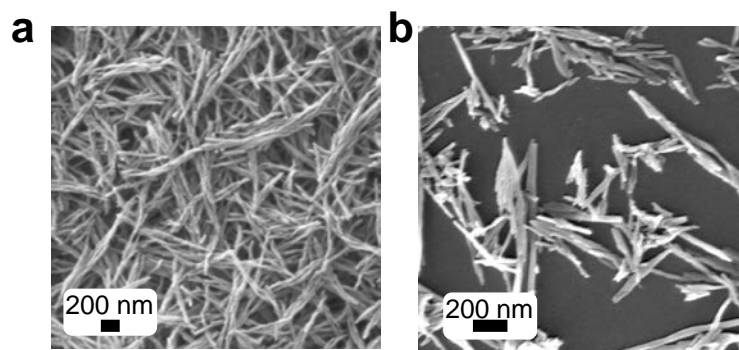

**Figure S1.** SEM micrographs of as-received  $\gamma$ -Al<sub>2</sub>O<sub>3</sub> fibers

## Supplementary Information 2.

The Zn K edge XAS spectra of references such as  $\text{Zn}(\text{NO}_2)_3 \cdot 6 \text{H}_2\text{O}$  and ZnO together with  $\text{ZnAl}_2\text{O}_4$  undoped and 0.02 Nd, 0.06 (%mol) Ce co-doped nanofibers are shown in **Figure S2a**.

As  $\text{Zn}(\text{NO}_2)_3 \cdot 6 \text{H}_2\text{O}$  was employed as a precursor, the XANES study of this compound and ZnO were included. The zinc nitrate shows the main absorption peak at 9667 eV. XANES analysis of ZnO nanoparticles reveal the presence of three main features; the main absorption line is located at 9668 eV, there is a positive absorption line at 9679 eV and a low-energy structure at 9962 eV; these peaks are characteristic features of ZnO particles. [44]

The absorption energy edge of the  $\text{ZnAl}_2\text{O}_4$  undoped and 0.02 Nd, 0.06 (%mol) Ce co-doped nanofibers is located at 9663 eV, confirming the  $2^+$  oxidation state of Zn cations. There is no pre-edge region due to filled 3d orbitals.

For Zn compounds, it has been observed that the near-edge structure exhibit particular characteristics related to  $\text{ZnO}_6$  octahedral or  $\text{ZnO}_4$  tetrahedral units, showing indeed different features. In the case of the compound with only  $\text{ZnO}_6$  octahedral units, a strong initial peak (9670 eV) appears joined with a second well-defined second peak (9682 eV). These features can be observed for example in smithsonite compound ( $\text{ZnCO}_3$ )[45]. On the other hand, for the compounds that have only  $\text{ZnO}_4$  tetrahedral units, the XANES has more complexity, showing at least three defined features due to many multiple scattering paths. The first feature is located lower energy (2 eV) in comparison with the octahedral Zn edge (9668), the other two peaks are located at 9671.8 and 9676 eV and a shoulder is situated at 9682.2 eV. Besides, a fourth peak appears at 9690 eV for a spinel structure such as franklinite,  $\text{ZnFe}_2\text{O}_4$ .

In comparison with the XANES spectrum of the Zinc nitrate, the spectra of  $\text{ZnAl}_2\text{O}_4$  undoped and 0.02 Nd, 0.06 (%mol) Ce co-doped nanofibers split into three peaks at 9663, 9667 and 9672 eV and a shoulder at 9678 eV. This is consistent with the previous observations done by other authors in Zn compounds that have mainly  $\text{ZnO}_4$  tetrahedral units. Specifically, these main three peaks have been observed by other authors in  $\text{ZnFe}_2\text{O}_4$ , establishing that the intensity of the second peak increases, and the positions of the peaks shift slightly to lower energies in case of inversion of the spinel. Moreover, the intensity of the shoulder located at 9677 eV decreases moderately. [46] Therefore, a qualitative assignation of tetrahedral and octahedral units can be established. Here, there is no considerable difference between the sample undoped and highly doped, so we can not conclude a

rough indication of tetrahedral or octahedral units. However, the presence of the four features at the energies previously indicated can be assigned mainly to tetrahedral contribution.

In normal spinel.  $ZnAl_2O_4$  the zinc atoms are tetra-coordinated by oxygen at 1.996 Å and 12 Al atoms are at 3.500 Å as second neighbors.

X-ray absorption spectra were also collected at the Zn K edge at 9659 eV to examine the EXAFS (Figure S2b). The resulting data are plotted in Fig. S2b. Data are not phase corrected, to be consistent with previous literature reports. In the Fourier transform (FT) at the Zn K-edge, two main peaks are observable at 1.5 Å attributed to the first coordination shell related to Zn-O interaction that represents the  $[ZnO_4]$  tetrahedra. The second peak is located at 3 Å ascribed the second and third coordination shell related to the Zn- Al interaction and the Zn-Zn interaction ( $[ZnO_4]$ ). A shoulder is also observable at 2.5 Å.

The Zn K edge EXAFS spectra for  $ZnAl_2O_4$  undoped and 0.02 Nd, 0.06 (%mol) Ce co-doped nanofibers were fit up to the second shell using the ARTEMIS software. The scattering paths were obtained from FEFF6.

For the Zn K-edge EXAFS spectrum of  $ZnAl_2O_4$ , the only large second peak was found at 3 Å, indicating the occupancy of all  $Zn^{2+}$  ions in the tetrahedral (A) sites. [47] (Figure S2b). The appearance of an additional peak at 2.5 Å indicates Zn octahedrally coordinated, it means Zn atoms occupy B sites, appearing a new shell of Al atoms from central Zn. The contribution around 2.5 Å in the FT should increase if the inversion rate is higher and the opposite trend should occur for the peak located at 3 Å [48]. From experimental results obtained, a low degree of inversion seem to be present since at the Zn K-edge the most intense peak is centered at about 3 Å (mostly tetrahedral environment). These results corroborate the results obtained in XRD refinement.

| Sample                      | ZnO                     |                                   | $ZnAl_2O_4$ undoped     |                                   | $ZnAl_2O_4$ 0.02 Nd, 0.06 (mol%) |                                   |
|-----------------------------|-------------------------|-----------------------------------|-------------------------|-----------------------------------|----------------------------------|-----------------------------------|
|                             | Interionic distance (Å) | $\sigma$ ( $10^{-3} \text{Å}^2$ ) | Interionic distance (Å) | $\sigma$ ( $10^{-3} \text{Å}^2$ ) | Interionic distance (Å)          | $\sigma$ ( $10^{-3} \text{Å}^2$ ) |
| Zn-O                        | 1.969 ± 0.003           | 6.3 ± 0.9                         | 1.937 ± 0.012           | 6 ± 1                             | 1.936 ± 0.012                    | 6 ± 1                             |
| Zn-Al 2 <sup>nd</sup> Shell | -                       | -                                 | 3.313 ± 0.022           | 5 ± 2                             | 3.313 ± 0.022                    | 5 ± 2                             |
| Zn-O 2 <sup>nd</sup> Shell  | -                       | -                                 | 3.249 ± 0.033           | 9 ± 5                             | 3.249 ± 0.033                    | 9 ± 6                             |
| Zn-Zn 2 <sup>nd</sup> Shell | 3.239 ± 0.001           | 9.5 ± 0.5                         | 3.535 ± 0.017           | 5 ± 1                             | 3.5343 ± 0.017                   | 5 ± 1                             |

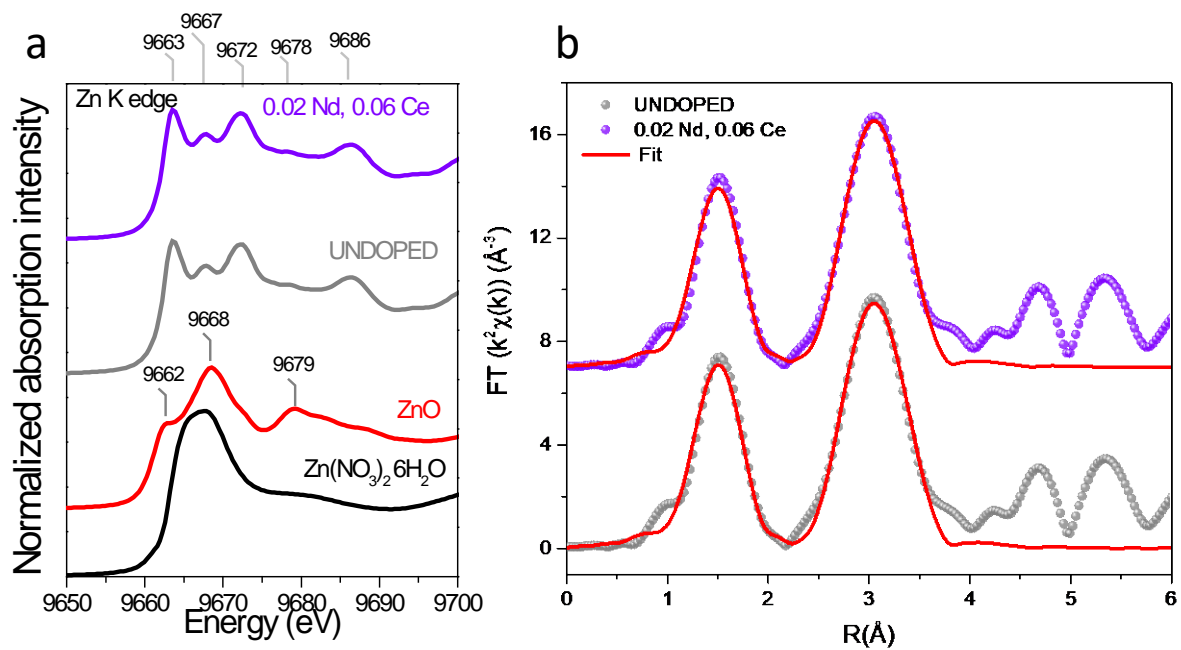

**Figure S2.** XANES and EXAFS study of Zn K edge of ZnAl<sub>2</sub>O<sub>4</sub> undoped and 0.02 Nd, 0.06 (%mol) Ce co-doped nanofibers **a** XANES Zn K edge spectra. **b.** FT k<sup>2</sup>-weighted magnitude of the Zn K EXAFS across ZnAl<sub>2</sub>O<sub>4</sub> undoped and 0.02 Nd, 0.06 (%mol) Ce co-doped nanofibers. The first coordination shell Zn-O is around 1.5 Å and the second coordination shell for Zn-Zn, Zn-O and Zn-Al scattering paths is around 3.0 Å. Data are not phase corrected, to be consistent with previous literature reports.

### Supplementary Information 3.

To carry out the cytotoxicity study, assays were performed on tumor epithelial cell line HeLa. The HeLa cells were incubated with a 1, 10 and 100  $\mu\text{g}/\text{mL}$  concentration of  $\text{ZnAl}_2\text{O}_4$  nanofibers for 24h. After that, cell viability was determined by the (3-(4,5-dimethylthiazol-18 2-yl)-2,5-diphenyltetrazolium bromide, called as MTT assay.

The cell survival was determined from the 540 nm absorption band is measured in each assay. The results were expressed as a percentage in comparison with control cells.

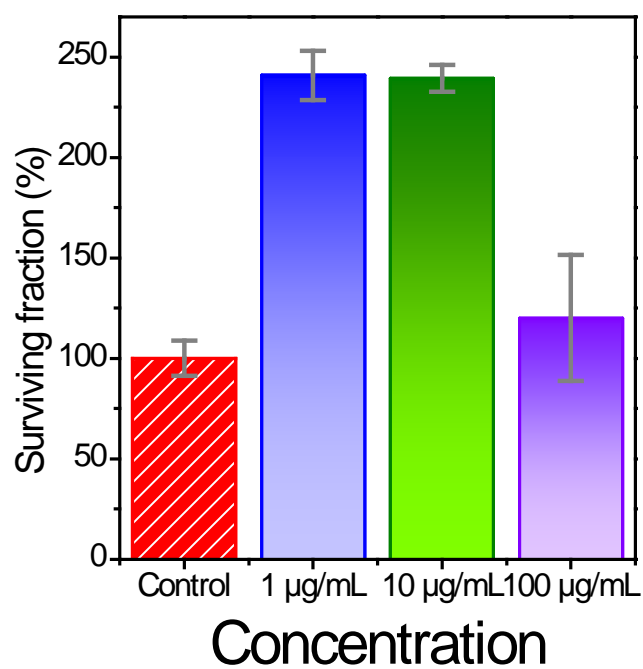

**Figure S3.** Cytotoxicity of nanofibers. Each data represents the mean values at least five independent experiments. The results were expressed as a percentage in comparison with control cells.
